# Supplementary material for: Neutralizing antibody response and associated factors in Coronavirus-19 disease (COVID-19) up to one month
Source: publisher site journal article supplement (doi:10.1515/tjb-2021-0200), 2022-01-20
Supplement: Supplementary file 1 [file j_tjb-2021-0200_suppl.docx]

**Production of Recombinant RBD-Antigen for In House ELISA Tests**

The RBD coding sequence (319-541) was optimized for human expression, and synthesized from Genewiz Inc. C-terminal six histidine tag and secretion signal (MFIFLLFLTLTSGS) were added to RBD sequence. The synthesized fragment was assembled into AP2u2-mCherry (a gift from Christien Merrifield) via Gibson Assembly (13). The sequence-verified vector was isolated via MidiPrep kit (Machenary&Niegel, Germany), and transfected into HEK293T cells using Lipofectamine 3000 (Thermo Scientific, USA) reagent. After 8 hours of transfection, cell media was changed to Opti-MEM (Thermo Scientific, USA) and incubated for 3 days at 37 ˚C, 5% CO2 atmosphere. Then, cell supernatant was collected and clarified with centrifugation. Imidazole salt (Serva Electrophoresis GmbH) was dissolved in supernatant at final concentration of 10mM. pH of supernatant was adjusted at 7.4 and filtered through 0.22 µm cellulose acetate filter. One ml bed volume of Hispur cobalt resin (Thermo Scientific) was added into cell supernatant. The solution was incubated at room temperature for one hour. Hispur cobalt resin was collected using gravity column method. Resin was washed three times with one bed volume of wash buffer (20 mM imidazole, 300 mM NaCl, 50 mM sodium phosphate pH=7.4). Bound proteins were eluted with five times with one bed volume of elution buffer (150 mM imidazole, 300 mM NaCl, 50 mM sodium phosphate pH=7.4). Eluted proteins were desalted into 1xPBS with HiTrap desalting column (Cytiva Life Sciences) and stored at -20 ˚C. This proein was used for coating the ELISA plates.

In order to investigate presence of anti-RBD domain of SARS-CoV-2 IgGs and IgMs in patients’ serum, the flat-bottom microtiter plates (Immulon® 4HBX, Thermo Scientific, Rochester, NY) were coated with 50 µl RBD protein (1 ng/µl in PBS, pH: 7.4) overnight, at +4oC. This step was followed by blocking the wells with 3% skim milk (Serva Electrophoresis GmbH, Heidelberg, Germany) in PBS containing 0.1% Tween-20 (PBS-T) (100 µl/well) for 1 hour at ambient temperature. Blocking solution was removed from wells, and 1:100 dilutions of patient serum samples in 1% skim milk in PBS-T were added (100 µl/well). After 30 minutes of incubation at ambient temperature, the wells were washed 5 times with PBS-T. Horseradish Peroxidase (HRP)-conjugated mouse anti-human IgG-Fc (Sigma Aldrich, USA) or IgM antibodies (Abcam, USA) was added to wells (100 µl/well in 1:10000 dilution in PBS-T) for 30 minutes at room temperature. The removal of any unbound secondary antibodies by PBS-T washing, TMB substrate solution (Thermo Scientific, Rockford, IL) was added to wells (100 µl/well) and the plates were incubated in dark for 10 minutes at room temperature. The reaction was stopped with 0.16 M H2SO4 (100 µl/well). The absorbance values at 450 nm were measured within 10 minutes using a microplate reader.
